# Supplementary material for: Insight into blocking heme transfer by exploiting molecular interactions in the core Isd heme transporters IsdA-NEAT, IsdC-NEAT, and IsdE of Staphylococcus aureus
Source: Royal Society of Chemistry journal article supplement (doi:10.1039/c2mt20067h), 2012-01-01
Supplement: c2mt20067h.pdf [file c2mt20067h.pdf]

## Supporting Information

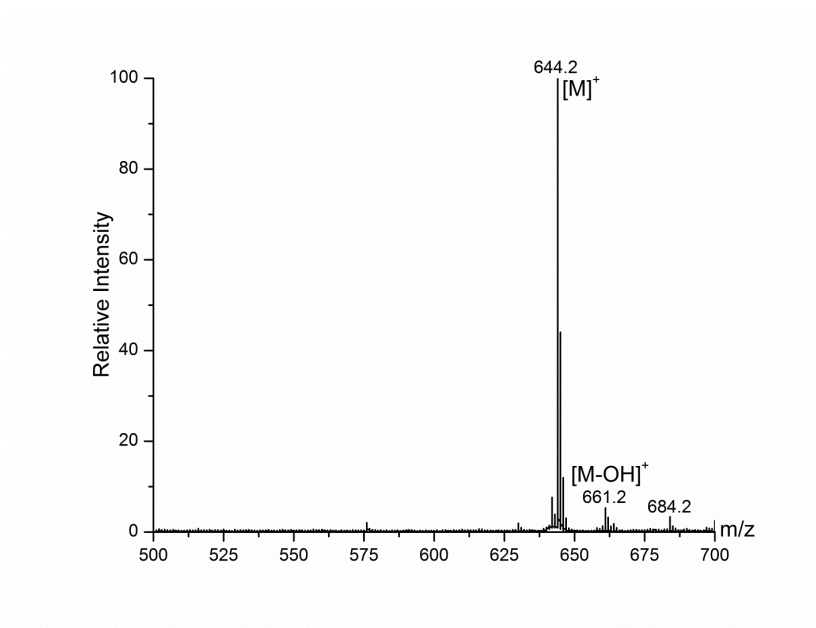

Figure S1: ESI-MS charge state data for Fe(III)-PPIX-DME. The mass exactly matches the theoretical mass of 644.24 Da.
